# Supplementary material for: Neuron-type specific aging-rate reveals age decelerating interventions preventing neurodegeneration
Source: Research Square preprint supplement (doi:10.21203/rs.3.rs-4360587/v1), 2024-05-29
Supplement: Supplementary file 1 [file f263c66ff80701605f8dc9af.docx]

Supplementary Figure Legends

Supplementary Figure 1

1. Distribution of transcriptomic age predictions. The 67 neurons of the Calico day 1 dataset were predicted with BitAge and sorted by their predicted age. The x-axis shows the rank of the prediction is ascending order, the y-axis the predicted age.
2. BitAge predictions on the CeNGEN and the Calico day 1 dataset are highly correlated (Pearson correlation 0.64, p-value 5.8e-09). The x-axis shows the BitAge predictions of the CeNGEN dataset, the y-axis BitAge predictions of the Calico day 1 dataset. 67 neurons are plotted. The regression model fit with a 95% confidence interval (shadowed area) is shown.
3. Predictions with BitAge and a stochastic data-based clock on the CeNGEN dataset are highly correlated (Pearson correlation 0.65, p-value 5.5e-17). The x-axis shows the BitAge predictions of the CeNGEN dataset, the y-axis stochastic data-based clock predictions of the CeNGEN dataset. All 128 neurons are plotted. The regression model fit with a 95% confidence interval (shadowed area) is shown.

Supplementary Figure 2

1. Amphid neurons are predicted to be significantly older than non-amphid neurons in the Calico day 1 dataset. Two-sided t-test p-value: 4.2e-08.
2. Amphid neurons are predicted to be significantly older than non-amphid neurons in the CeNGEN dataset with a stochastic data-based clock. Two-sided t-test p-value: 7.2e-22.
3. Amphid neurons express significantly more neuropeptides than non-amphid neurons. Two-sided t-test p-value: 5.95e-12.
4. Amphid neurons express significantly more receptor genes than non-amphid neurons. Two-sided t-test p-value:8.45e-09
5. The number of neurotransmitters is not significantly different in amphid and non-amphid neurons. Two-sided t-test p-value: 0.94
6. The number of innexins is not significantly different in amphid and non-amphid neurons. Two-sided t-test p-value: 0.053
7. The number of expressed neuropeptides (y-axis) is significantly correlated (Pearson correlation 0.26, p-value 3e-03) with the predicted age by BitAge in the CeNGEN dataset. The regression model fit with a 95% confidence interval (shadowed area) is shown.
8. The number of expressed receptor genes (y-axis) is significantly correlated (Pearson correlation 0.22, p-value 1.2e-02) with the predicted age by BitAge in the CeNGEN dataset. The regression model fit with a 95% confidence interval (shadowed area) is shown.
9. The number of expressed neuropeptides (y-axis) is significantly correlated (Pearson correlation 0.34, p-value 4.4e-03) with the predicted age by BitAge in the Calico day 1 dataset. The regression model fit with a 95% confidence interval (shadowed area) is shown.
10. The number of expressed receptor genes (y-axis) is significantly correlated (Pearson correlation 0.42, p-value 4.7e-04) with the predicted age by BitAge in the Calico day 1 dataset. The regression model fit with a 95% confidence interval (shadowed area) is shown.
11. The number of expressed neuropeptides (y-axis) is significantly correlated (Pearson correlation 0.43, p-value 4.8e-07) with the predicted age by a stochastic data-based clock in the CeNGEN dataset. The regression model fit with a 95% confidence interval (shadowed area) is shown.
12. The number of expressed receptor genes (y-axis) is significantly correlated (Pearson correlation 0.39, p-value 6.9e-06) with the predicted age by a stochastic data-based clock in the CeNGEN dataset. The regression model fit with a 95% confidence interval (shadowed area) is shown.
13. Fraction-plots displaying the fraction of nematodes expressing neuronal volume markers in the ASI neuron categorized as ‘healthy’, ‘mildly damaged’, and ‘severely damaged’. Three to four cohorts were analysed, comprised of 10 – 30 individual nematodes, for every timepoint indicated. Kruskal-Wallis-test was employed to test for significant differences.
14. The number of expressed innexin genes (y-axis) is significantly anti-correlated (Pearson correlation -0.19, p-value 3.7e-02) with the predicted age by BitAge in the CeNGEN dataset. The regression model fit with a 95% confidence interval (shadowed area) is shown.
15. The number of expressed innexin genes (y-axis) is not-significantly anti-correlated (Pearson correlation -0.2, p-value 1.1e-01) with the predicted age by BitAge in the Calico day 1 dataset. The regression model fit with a 95% confidence interval (shadowed area) is shown.
16. The number of expressed innexin genes (y-axis) is not-significantly anti-correlated (Pearson correlation -0.12, p-value 1.9e-01) with the predicted age by a stochastic data-based clock in the CeNGEN dataset. The regression model fit with a 95% confidence interval (shadowed area) is shown.
17. The number of total synapses (y-axis) is not-significantly anti-correlated (Pearson correlation -0.04, p-value 6.6e-01) with the predicted age by BitAge in the CeNGEN dataset. The regression model fit with a 95% confidence interval (shadowed area) is shown.
18. The number of total synapses (y-axis) is not-significantly anti-correlated (Pearson correlation -0.21, p-value 1.3e-01) with the predicted age by BitAge in the Calico day 1 dataset. The regression model fit with a 95% confidence interval (shadowed area) is shown.
19. The number of total synapses (y-axis) is not-significantly anti-correlated (Pearson correlation -0.07, p-value 4.6e-01) with the predicted age by a stochastic data-based clock in the CeNGEN dataset. The regression model fit with a 95% confidence interval (shadowed area) is shown.
20. Ciliated neurons are predicted to be significantly older than non-ciliated neurons in the Calico day 1 dataset. Two-sided t-test p-value: 9.04e-05
21. Ciliated neurons are predicted to be significantly older than non-ciliated neurons in the CeNGEN dataset with a stochastic data-based clock. Two-sided t-test p-value: 2.29e-14
22. Ciliated neurons are divided into 5 classes depending on where its cilia terminate. Neurons with exposed cilia are significantly older than non-ciliated neurons or neurons which cilia terminate in the cuticle or behind the cuticle in the Calico day 1 dataset (one-way ANOVA p-value: 1.79e-08, with a post-hoc Tukey test).
23. Ciliated neurons are divided into 5 classes depending on where its cilia terminate. Neurons with exposed cilia are significantly older than non-ciliated neurons or neurons which cilia terminate in the cuticle or behind the cuticle in the CeNGEN dataset with a stochastic data-based clock (one-way ANOVA p-value: 6.6e-18, with a post-hoc Tukey test).

Supplementary Figure 3

1. Output of the Dmin function of the Mfuzz R package. Soft clustering for cluster numbers ranging from 2-12 (x-axis) were calculated with Dmin. For each cluster number, Dmin calculates the distance between the centroids of the clusters (centroid distance) and reports the minimum centroid distance across 3 repetitions (y-axis). The optimal cluster number is estimated from the “elbow” of the plot (indicated by a dashed line), i.e. the cluster number which shows a sharp decline in the minimum centroid distance (cluster number=4).

Supplementary Figure 4

1. Fraction-plots displaying the fraction of nematodes expressing neuronal volume markers in the OLL neuron categorized as ‘healthy’, ‘mildly damaged’, and ‘severely damaged’ that were treated with 2.5 mM syringic acid (SA) or 10 nM vanoxerine (VX) for 24 h. Three to four cohorts were analysed, consisting of 10 – 25 individual nematodes. Kruskal-Wallis-test was employed to test for significant differences.
