# Supplementary figures and images for: Neuron-type specific aging-rate reveals age decelerating interventions preventing neurodegeneration
Source: Research Square preprint supplement (doi:10.21203/rs.3.rs-4360587/v1), 2024-05-29

A

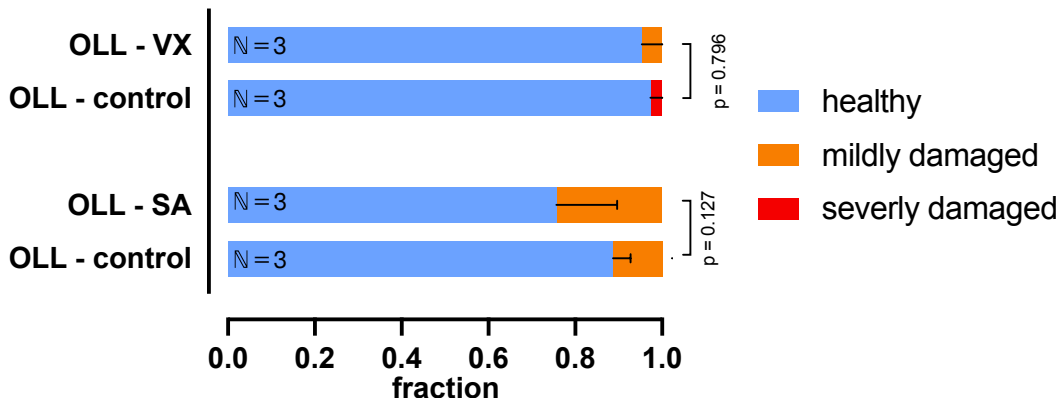

Supplement: Supplementary file 1 [file dae90021cdf493111c3c40e6.pdf]
